# Supplementary material
Source: publisher figshare collection journal article supplement (https://acs.figshare.com/ndownloader/files/17930267)
Supplement: Supplementary file 1 [file 17930267]

Supporting Information

**Rapid and controllable formation of robust superwetable microchips by click reaction for efficient o-phthalaldehydes and glucose detection**

*Jianying Huang<sup>a</sup>, Hui Yang<sup>a,b</sup>, Jiajun Mao<sup>a</sup>, Fang Guo<sup>b</sup>, Yan Cheng<sup>b</sup>, Zhong Chen<sup>c</sup>, Xiaoqin Wang<sup>b</sup>,  
Xiao Li<sup>a</sup>, Yuekun Lai<sup>a,b\*</sup>*

<sup>a</sup> College of Chemical Engineering, Fuzhou University, Fuzhou 350116, P. R. China.

<sup>b</sup> National Engineering Laboratory for Modern Silk, College of Textile and Clothing Engineering, Soochow University, Suzhou 215123, P. R. China.

<sup>c</sup> School of Materials Science and Engineering, Nanyang Technological University, 50 Nanyang Avenue, Singapore.

Corresponding Authors E-mail: yklai@fzu.edu.cn

**Number of Pages: 8**

**Number of Figures: 14**

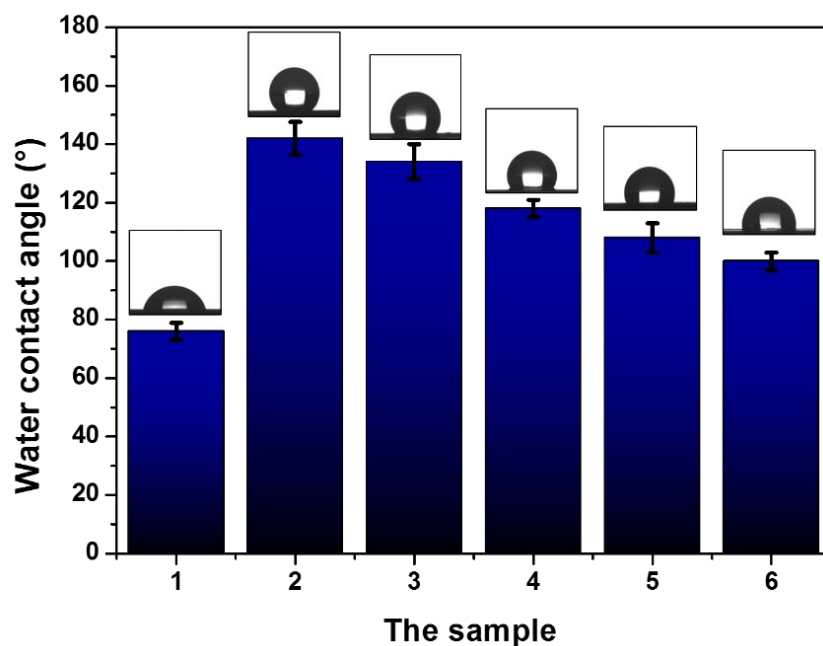

**Figure S1.** The WCA of sample 1: smooth film. Rough PM-EDMA films: 24 wt.% PM, 16 wt.% ED with different proportions of 1-decanol and cyclohexanol, sample 2: 1-decanol (60 wt.%), sample 3: 1-decanol (50 wt.%) and cyclohexanol (10 wt.%), Sample 4: 1-decanol (40 wt.%) and cyclohexanol (20 wt.%), sample 5: 1-decanol (20 wt.%) and cyclohexanol (40 wt.%), sample 6: cyclohexanol (60 wt.%).

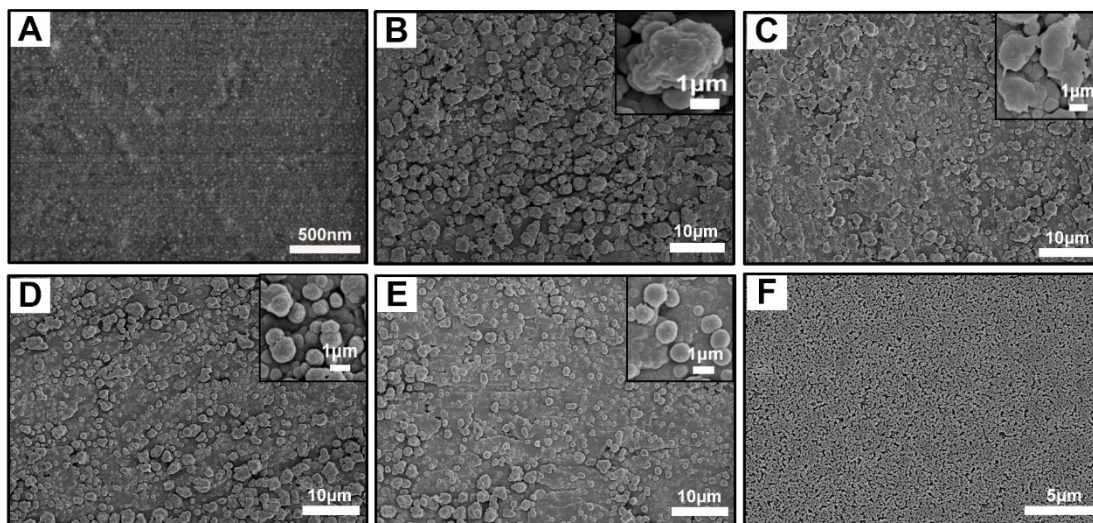

**Figure S2.** The SEM images of smooth film (A). Rough PM-EDMA film: 24 wt.% PM, 16 wt.% EDMA with different proportions of 1-decanol and cyclohexanol, (B) 1-decanol (60 wt.%), (C) 1-decanol (50 wt.%) and cyclohexanol (10 wt.%), (D) 1-decanol (40 wt.%) and cyclohexanol (20 wt.%), (E) 1-decanol (20 wt.%) and cyclohexanol (40 wt.%), (F) cyclohexanol (60 wt.%).

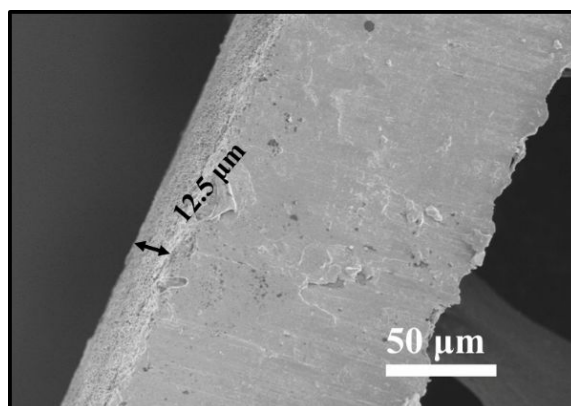

**Figure S3.** Cross-sectional SEM image of 12.5 µm PM-EDMA film.

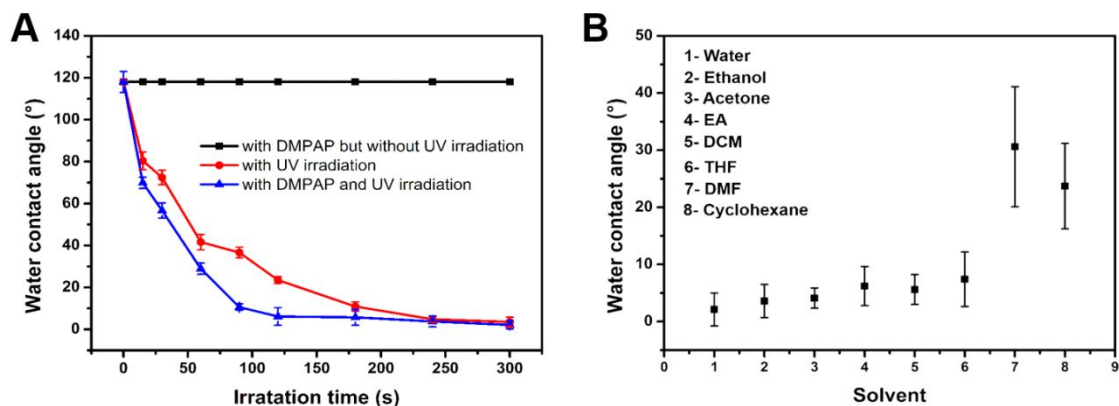

**Figure S4.** (A) The WCA of PM-EDMA film modified with 2-mercaptoethanol under the different reaction conditions. (B) WCA of PM-EDMA film functionalized with 2-mercaptoethanol dissolved in different solvents.

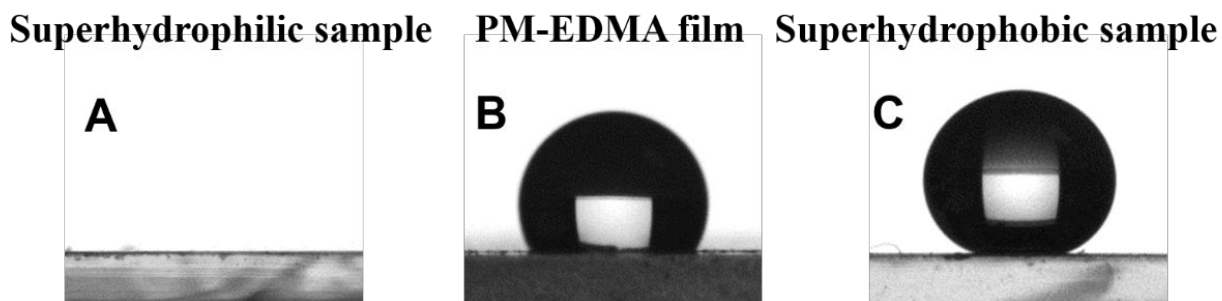

**Figure S5.** The WCA images of superhydrophilic sample (A), PM-EDMA film (B) and superhydrophobic sample on the glass substrate.

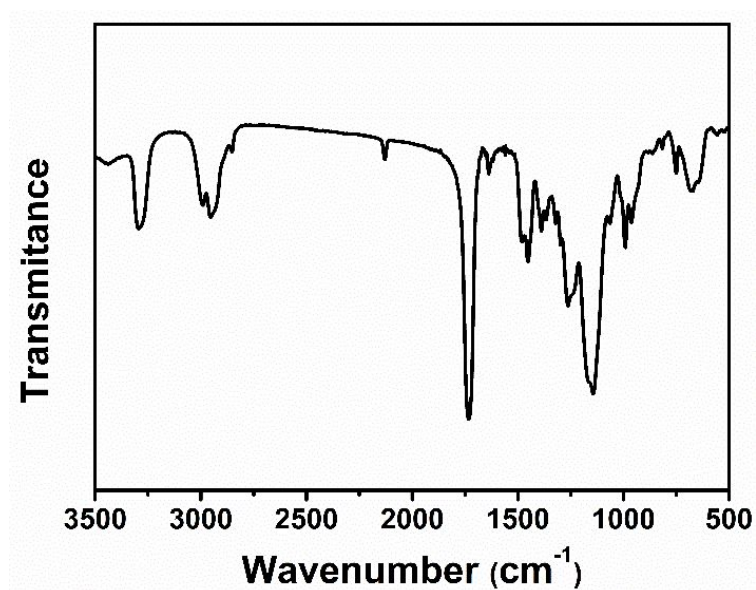

**Figure S6.** The FTIR of the PM-EDMA film.

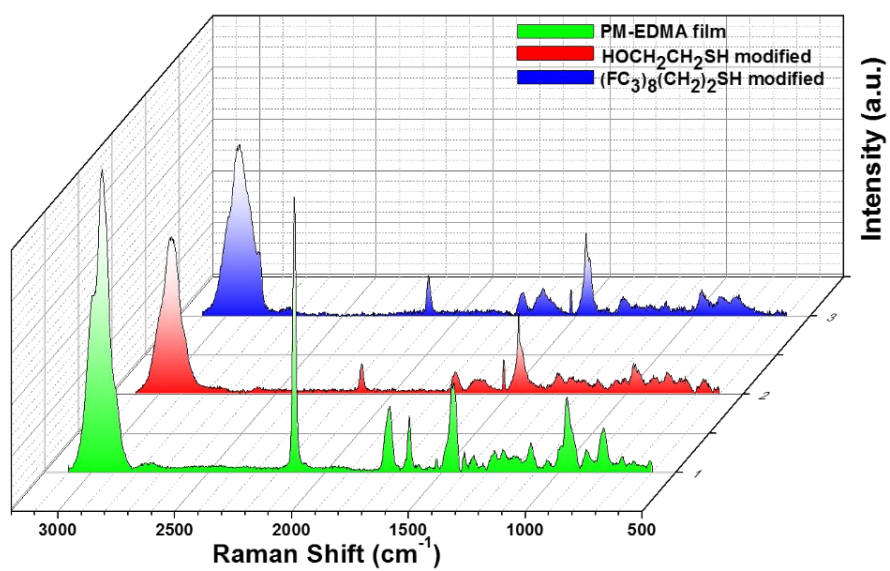

**Figure S7.** The Raman spectra of PM-EDMA film (green), superhydrophilic sample (red) and superhydrophobic sample (blue).

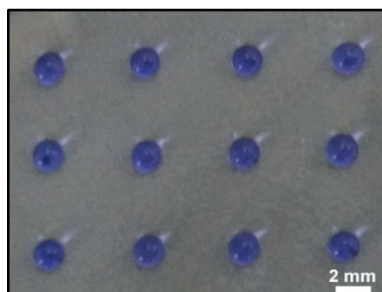

**Figure S8.** The optical photograph of 2  $\mu\text{L}$  acid blue droplets were distributed onto the superhydrophilic dots of the prepared superwetable micropattern.

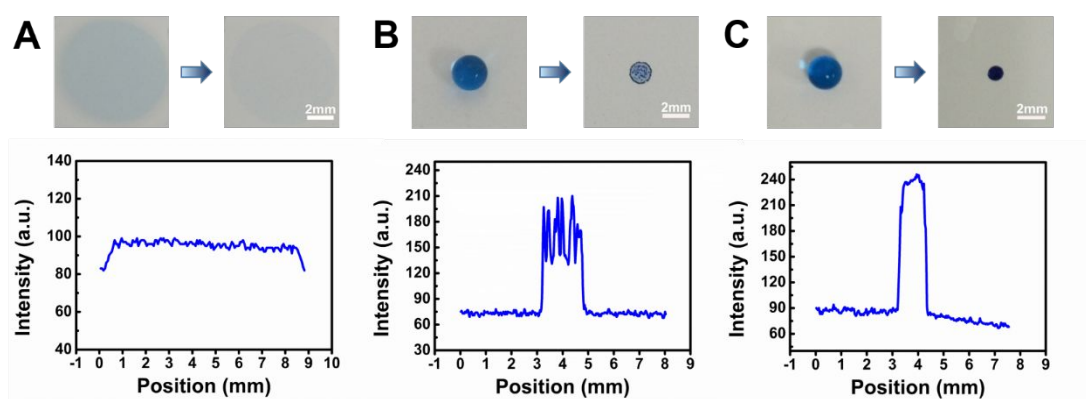

**Figure S9.** The optical images of acid blue solution (2  $\mu\text{L}$ ) before and after evaporation and the intensity analysis of deposit spots on the superhydrophilic sample (A), superhydrophobic sample (B) and superwetable micropattern (the diameter is 1 mm) (C).

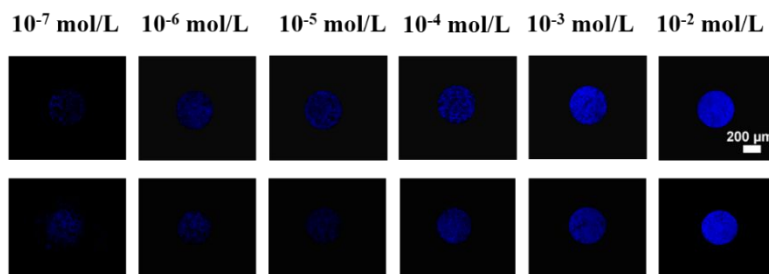

**Figure S10.** The fluorescence image and intensity of OPA on the microchip after water drop test.

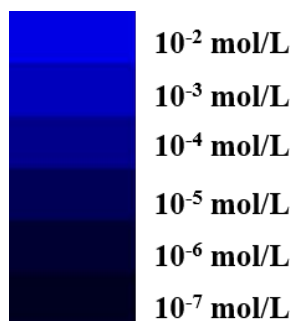

**Figure S11.** The standard color chart of different OPA concentration.

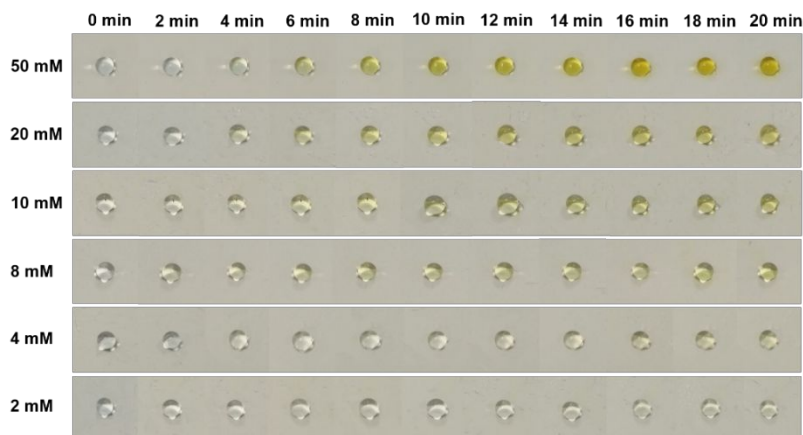

**Figure S12.** The colorimetric photographs of different concentration glucose droplet every 2 min.

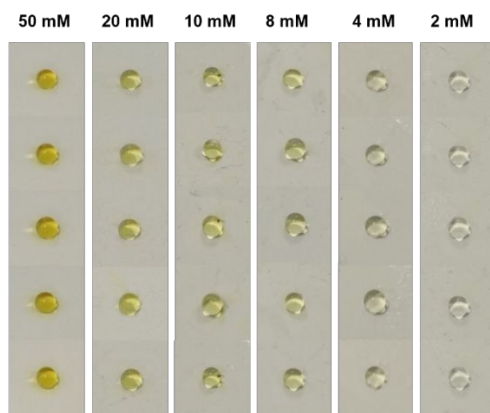

**Figure S13.** The optical photographs of repeated detection of glucose with different concentrations. Each row represents one test; six tests are shown.

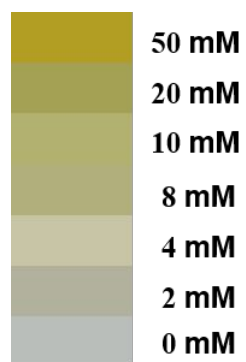

**Figure S14.** The standard color chart of different glucose concentration.
